# Supplementary material for: Statistical model integrating interactions into genotype-phenotype association mapping: an application to reveal 3D-genetic basis underlying Autism
Source: bioRxiv or medRxiv preprint supplement (doi:10.1101/2020.07.27.222364), 2020-07-27
Supplement: Supplementary file [file media-1.pdf]

## Supplementary Notes

### Mathematical formulations

Our model to be solved is:

$$Y = u_i + u_g + \varepsilon \quad (1)$$

Where  $u_i \sim N(0, \sigma_i^2 K_i)$ ,  $u_g \sim N(0, \sigma_g^2 K_g)$ , and  $\varepsilon \sim N(0, \sigma_e^2 I)$ .

#### Step 1: estimating the genetic variance component $\sigma_g^2$

First, we controlled the population structure through solving  $\sigma_g^2$  to remove the correlation between individuals. We use  $Y_c$ , a centered  $Y$ , to regress on the random term  $u_g$  and errors  $\varepsilon$  as follows:

$$Y_c = u_g + \varepsilon \quad (2)$$

where  $Y_c = Y - \bar{Y}$ ,  $\bar{Y}$  is the average of  $Y$ ,  $u_g \sim N(0, \sigma_g^2 K_g)$ , and  $\varepsilon \sim N(0, \sigma_e^2 I)$ . The eigen-decomposition of  $K_g$  is  $K_g = U_x S_x U_x^{-1}$ , where  $S_x = \begin{bmatrix} \lambda_{x1} & \cdots & 0 \\ \vdots & \ddots & \vdots \\ 0 & \cdots & \lambda_{xn} \end{bmatrix}$  is a matrix of eigenvalues. A new parameter  $\delta = \frac{\sigma_e^2}{\sigma_g^2}$  is defined so that  $Y_c \sim MVN(0, \sigma_g^2(K_g + \delta I))$ . The estimated variance components for  $\sigma_g^2$ ,  $\sigma_e^2$  are therefore written in the following equations.

$$\hat{\sigma}_g^2 = \frac{1}{n} \sum_{i=1}^n \frac{V_{xi}^2}{(\hat{\delta} + \lambda_{xi})} \quad (3)$$

$$\hat{\sigma}_e^2 = \frac{\hat{\delta}}{n} \sum_{i=1}^n \frac{V_{xi}^2}{(\hat{\delta} + \lambda_{xi})} \quad (4)$$

Where  $V_x = U_x^T Y_c$ ,  $\lambda_{xi}$  is the eigen value,  $\hat{\delta}$  can be estimated by solving the non-linear equation below through Newton-Raphson method.

$$\sum_{i=1}^n \left[ \frac{nV_{xi}^2}{\left( \sum_{i=1}^n \frac{V_{xi}^2}{(\delta + \lambda_{xi})} \right) (\delta + \lambda_{xi})^2} - \frac{1}{(\delta + \lambda_{xi})} \right] = 0 \quad (5)$$

In Newton-Raphson method, we let  $g(\delta_n) = \sum_{i=1}^n \left[ \frac{nV_{ij}^2}{\left(\sum_{i=1}^n \frac{v_{xi}^2}{(\delta_n + \lambda_{xi})}\right)(\delta_n + \lambda_{xi})^2} - \frac{1}{(\delta_n + \lambda_{xi})} \right]$ ,

then by repeating the process:  $\delta_{n+1} = \delta_n - \frac{g(\delta_n)}{g'(\delta_n)}$ , until  $|\delta_{n+1} - \delta_n| \leq 10^{-6}$ , we can approximately solve the equation, yielding an estimate of  $\delta$  (the variance ratio). Then we can calculate the estimates of  $\hat{\sigma}_g^2$  and  $\hat{\sigma}_e^2$ . Then the decorrelation matrix  $\hat{D}_x$  can be formed:

$$\hat{D}_x = (\hat{\sigma}_g^2 S_x + \hat{\sigma}_e^2 I)^{-\frac{1}{2}} U_x^T \quad (6)$$

### Proof of the soundness of the decorrelation procedure

In equation (2)  $Y_c = u_g + \varepsilon$

$$\begin{aligned} \text{Var}(Y_c) &= \sigma_g^2 K_g + \sigma_e^2 I \\ &= \sigma_g^2 U_x S_x U_x^T + \sigma_e^2 U_x U_x^T \\ &= U_x (\sigma_g^2 S_x + \sigma_e^2 I) U_x^T \end{aligned}$$

The following derivation justifies that  $D_x = (\sigma_g^2 S_x + \sigma_e^2 I)^{-\frac{1}{2}} U_x^T$  will lead to the desired property that  $\text{Var}(D_x Y) = I$ .

$$\begin{aligned} \text{Var}(D_x Y) &= D_x \text{Var}(Y) D_x^T \\ &= D_x U (\sigma_g^2 S_x + \sigma_e^2 I) U_x^T D_x^T \\ &= (\sigma_g^2 S_x + \sigma_e^2 I)^{-\frac{1}{2}} U_x^T U_x (\sigma_g^2 S_x + \sigma_e^2 I) U_x^T \left( (\sigma_g^2 S_x + \sigma_e^2 I)^{-\frac{1}{2}} U_x^T \right)^T \\ &= (\sigma_g^2 S_x + \sigma_e^2 I)^{-\frac{1}{2}} U_x^T U_x (\sigma_g^2 S_x + \sigma_e^2 I) U_x^T U_x (\sigma_g^2 S_x + \sigma_e^2 I)^{-\frac{1}{2}} \\ &= (\sigma_g^2 S_x + \sigma_e^2 I)^{-\frac{1}{2}} I (\sigma_g^2 S_x + \sigma_e^2 I) I (\sigma_g^2 S_x + \sigma_e^2 I)^{-\frac{1}{2}} \\ &= (\sigma_g^2 S_x + \sigma_e^2 I)^0 \\ &= I \end{aligned}$$

Hence multiplying the decorrelation matrix  $D_x$  to  $Y$  can control the population stratification by removing the correlation between individuals.

### Step 2: solving the local variance component $\sigma_i^2$

After getting the decorrelation matrix  $\hat{D}_x$  from step 1, we applied this matrix to  $Y_c$ , and get  $Y_c^* = \hat{D}_x Y_c$ . So, equation (1) can be reformat to equation (7) as below, where

$u_i \sim N(0, \sigma_i^2 K_i)$ . The next step was to solve  $\sigma_i^2$  using low-rank trick proposed by FaST-LMM.

$$Y_c^* = u_i + \varepsilon \quad (7)$$

For details, please refer to the original paper of FaST-LMM (Lippert et al. 2011).

### **Details of running ILMM, LOCAL, EMMAX, SKAT**

ILMM, LOCAL, and EMMAX (Kang et al. 2010) methods are all implemented in Jawamix5 (Long et al. 2013; Xiong et al. 2019). More details can be found in the user manual in the GitHub (<https://github.com/theLongLab/Jawamix5>) for reference.

1. Convert genotype file from .csv format to .hdf5 format
  - a. Command line: `java -Xmx4g -jar /path/to/jawamix5.jar import -ig genotype.csv -o genotype.hdf5`
  - b. Parameters:
    - i. -ig: input genotype file in plain text (.CSV format)
    - ii. -o: output in HDF5 in format
  - c. Input file: genotype.csv
  - d. Output file: genotype.hdf5
2. Generate the genetic relationship matrices (GRM) based on input genotype file
  - a. Command line: `java -Xmx4g -jar /path/to/jawamix5.jar kinship -ig genotype.hdf5 -o genotype.kin`
  - b. Parameters:
    - i. -ig: input genotype file in HDF5 format
    - ii. -o: the output file prefix
  - c. Input file: genotype.hdf5
  - d. Output files:
    - i. genotype.kin.rescaled.IBS
3. Run ILMM method
  - a. Command line: `java -Xmx4g -jar /path/to/jawamix5.jar compound -ig genotype.hdf5 -ip phenotype.tsv -o ./ILMM_res/ -ik_g genotype.kin.rescaled.IBS -ic hic_info.txt`
  - b. Parameters:
    - i. -ig: input genotype file in HDF5 format
    - ii. -ip: phenotype file
    - iii. -o: output folder
    - iv. -ik\_g: the global genetic relationship matrices file

- v. -ic: input regions
  - c. Input files:
    - i. genotype.hdf5
    - ii. phenotype.tsv
    - iii. genotype.kin.rescaled.IBS
    - iv. hic\_info.txt (three columns separated by tab, an example listed below)
 

```
#header: Index Region1(chr; start; end) Region2
#content: C0 1;840000;850000 1;890000;900000
```
  - d. Output file:
    - i. ./ILMM\_res/xxx.csv
4. Run LOCAL method
- a. Command line: `java-Xmx4g -jar /path/to/jawamix5.jar local -ig genotype.hdf5 -ip phenotype.tsv -o ./LOCAL_res/ -ik_g genotype.kin.rescaled.IBS -w 5000`
  - b. Parameters:
    - i. -ig: input genotype file in HDF5 format
    - ii. -ip: phenotype file
    - iii. -o: output folder
    - iv. -w: tiling window size
    - v. -ik\_g: the global genetic relationship matrices file
  - c. Input file:
    - i. genotype.hdf5
    - ii. phenotype.tsv
    - iii. genotype.kin.rescaled.IBS
  - d. Output file:
    - i. ./LOCAL\_res/xxx.csv
5. Run EMMAX method
- a. Command line: `java-Xmx4g -jar /path/to/jawamix5.jar emmax -ig genotype.hdf5 -ip phenotype.tsv -o ./EMMAX_res/ -ik genotype.kin.rescaled.IBS -p 0.05`
  - b. Parameters:
    - i. -ig: input genotype file in HDF5 format
    - ii. -ip: phenotype file
    - iii. -o: output folder
    - iv. -ik: genetic relationship matrices file generated by function “kinship” or other user defined method

- v. -p: Bonferroni correction, variants whose p-values above 0.05/number of tests will not be written to the file.
- c. Input file:
  - i. genotype.hdf5
  - ii. phenotype.tsv
  - iii. genotype.kin.rescaled.IBS
- d. Output file:
  - i. ./EMMAX\_res/xxx.top

SKAT (Wu et al. 2010; Wu et al. 2011) was download as an R package (<https://cran.r-project.org/web/packages/SKAT/index.html>) and the p-values for regions were obtained by first computing the parameters and residuals for SKAT using following command line a).

- a) `>> obj<-SKAT_Null_Model(y ~ 1, out_type="D")`, where y denotes phenotype matrix, `out_type="D"` means the phenotype is dichotomous.

To perform the association studies between the SNPs set and the phenotype, we used the command line b)

- b) `>> res_p_value <- SKAT(x, obj)$p.value`. Here, obj is generated by either a) or b) and x refers to genotype matrix for all SNPs in the SNPs set. "res\_p\_value" is the p-value for a tested SNP set associated with phenotype y. Please refer to the manual of SKAT for more details.

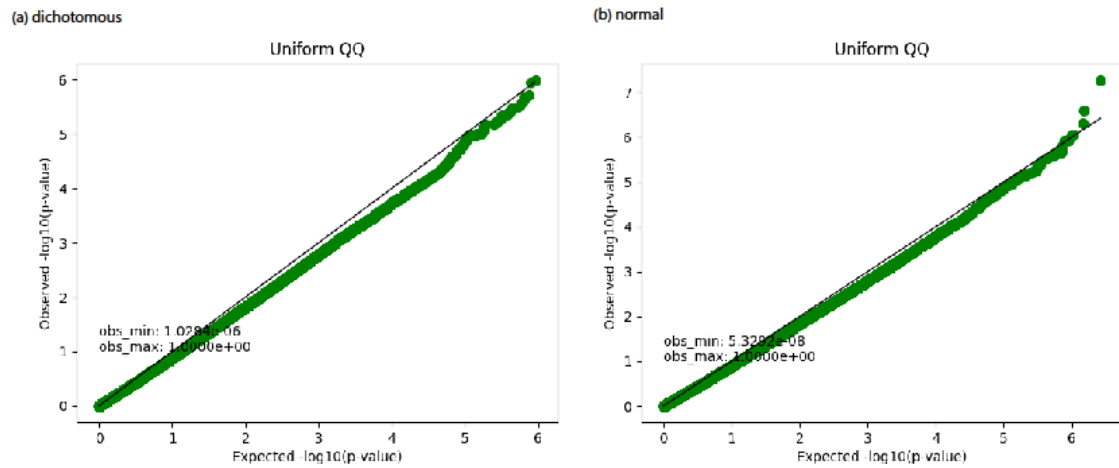

**Supplementary Figure S1.** Uniform QQ plot for simulated phenotype under null hypothesis. (a): Dichotomous phenotype (0 or 1); (b): Phenotype from normal distribution (mean zero and standard deviation 1).

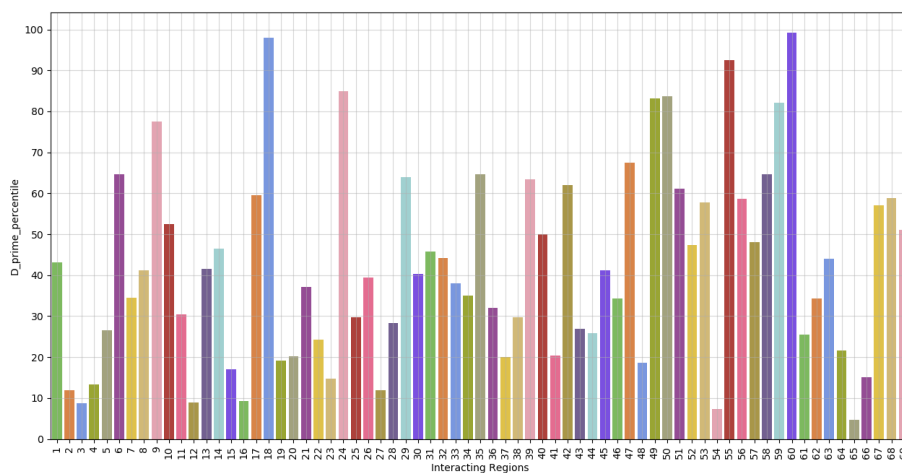

**Supplementary Figure S2.**  $D'$  values for 69 interacting regions associated with both ASD and gene expressions in the brain tissues.

## References

- Kang HM, Sul JH, Service SK, Zaitlen NA, Kong SY, Freimer NB, Sabatti C, Eskin E (2010) Variance component model to account for sample structure in genome-wide association studies. *Nat Genet* 42: 348-54. doi: 10.1038/ng.548
- Lippert C, Listgarten J, Liu Y, Kadie CM, Davidson RI, Heckerman D (2011) FaST linear mixed models for genome-wide association studies. *Nature Methods* 8: 833-835. doi: 10.1038/Nmeth.1681
- Long Q, Zhang Q, Vilhjalmsson BJ, Forai P, Seren Ü, Nordborg M (2013) JAWAMix5: an out-of-core HDF5-based java implementation of whole-genome association studies using mixed models. *Bioinformatics* 29: 1220-1222.
- Wu MC, Kraft P, Epstein MP, Taylor DM, Chanock SJ, Hunter DJ, Lin X (2010) Powerful SNP-set analysis for case-control genome-wide association studies. *Am J Hum Genet* 86: 929-942. doi: 10.1016/j.ajhg.2010.05.002
- Wu MC, Lee S, Cai TX, Li Y, Boehnke M, Lin XH (2011) Rare-Variant Association Testing for Sequencing Data with the Sequence Kernel Association Test. *American Journal of Human Genetics* 89: 82-93. doi: 10.1016/j.ajhg.2011.05.029
- Xiong Z, Zhang QR, Platt A, Liao WY, Shi XH, de los Campos G, Long Q (2019) OCMA: Fast, Memory-Efficient Factorization of Prohibitively Large Relationship Matrices. *G3-Genes Genomes Genetics* 9: 13-19. doi: 10.1534/g3.118.200908
